# Supplementary material for: Electrical and mechanical self-healing membrane using gold nanoparticles as localized “nano-heaters”
Source: Royal Society of Chemistry journal article supplement (doi:10.1039/c6tc03699f), 2016-01-01
Supplement: c6tc03699f1.pdf [file c6tc03699f1.pdf]

## Supporting Information

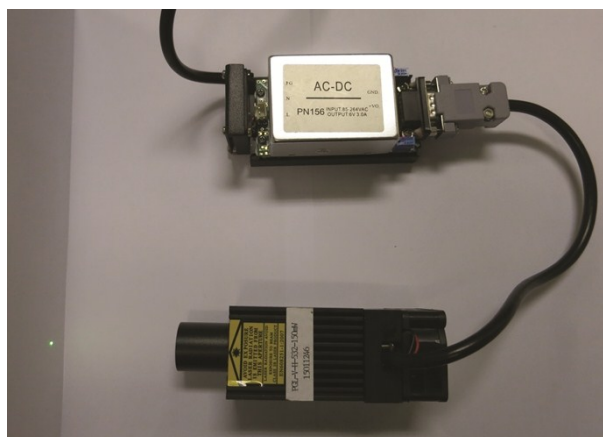

Fig. S1 Photograph of 532 nm laser.

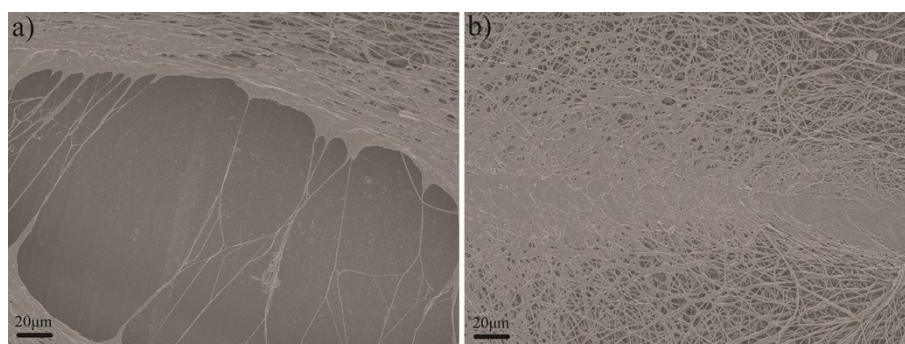

Fig. S2 SEM images of a) Au@PCL and b) Au@PCL<sub>x</sub> FMs with a typical crack after 532 nm light irradiation.

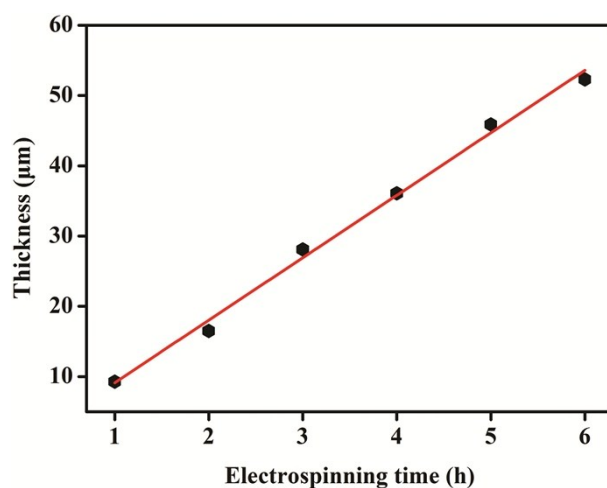

Fig. S3 Dependence of Au@PCL<sub>x</sub> FM thickness on electrospinning time.

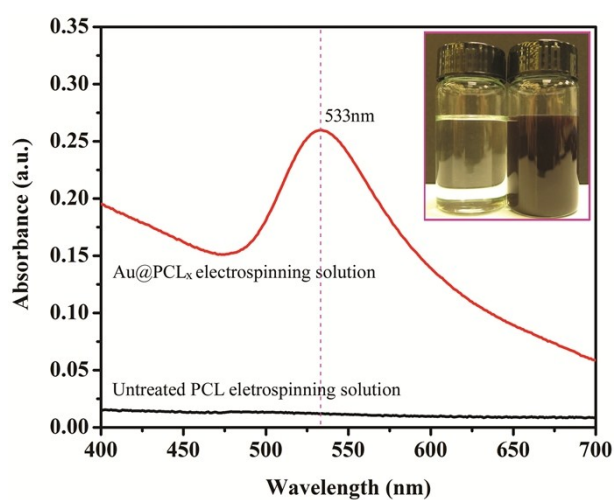

Fig. S4 UV-Vis absorption spectra of untreated PCL and Au@PCL<sub>x</sub> electrospinning solution; Inset shows the photograph of untreated PCL (left) and Au@PCL<sub>x</sub> (right) electrospinning solution.

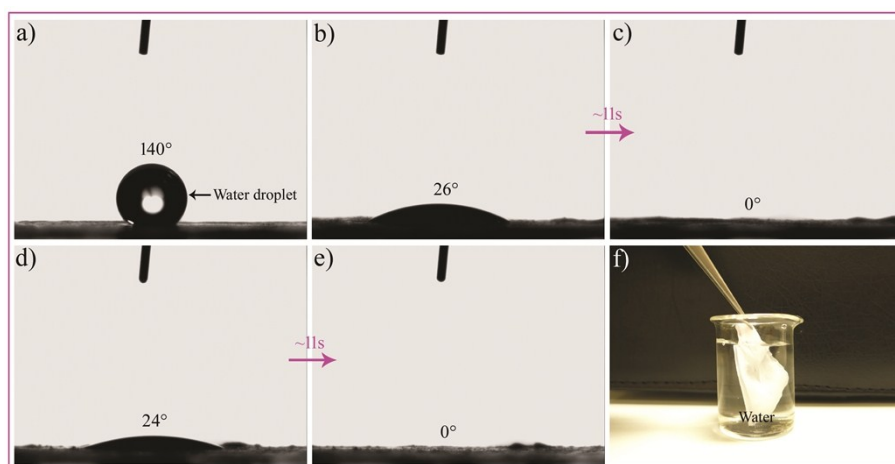

Fig. S5 a)-e) Photographs of water droplets on different PCL FMs: a) untreated PCL; b), c) PCL<sub>x</sub> and d), e) Au@PCL<sub>x</sub>. f) Photograph of Au@PCL<sub>x</sub> FM immersed in water.

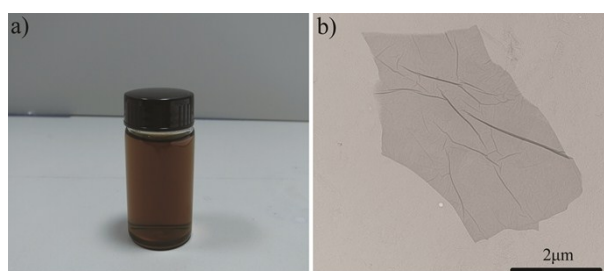

Fig. S6 a) Photograph of GO dispersion (1 mg/mL) and b) TEM image of GO.

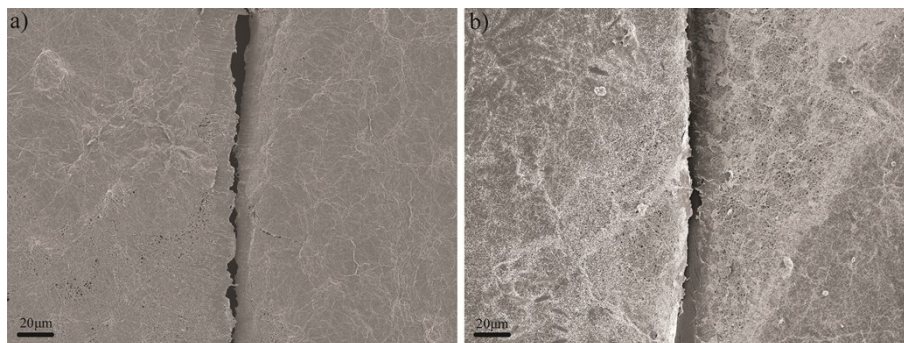

Fig. S7 SEM images of PCL<sub>x</sub>/rGO and PCL<sub>x</sub>/rGO/Ag FMs with a typical crack after 532 nm light irradiation.

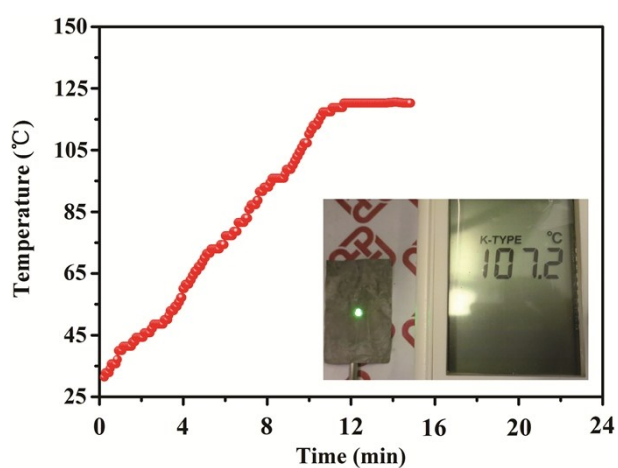

Fig. S8 Temperature versus time evolution of Au@PBS<sub>x</sub>/rGO/Ag FM after 532 nm light irradiation.

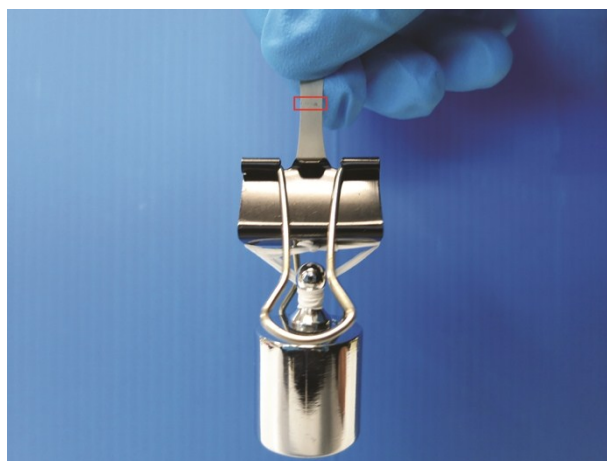

Fig. S9 Photograph of the optically healed Au@PCL<sub>x</sub>/rGO/Ag FM (marked by frame) withstanding a load >14 000 times its weight.

Table S1 Changes in mechanical properties of Au@PCL<sub>x</sub>/rGO/Ag FM before cutting and after self-healing.

| Samples                           | Tensile strength<br>(MPa) | Elongation<br>at break<br>(%) | Tensile strength<br>retention ratio<br>(%) |
|-----------------------------------|---------------------------|-------------------------------|--------------------------------------------|
| Before cutting                    | 4.85                      | 103.3                         | 100                                        |
| After one cutting-healing cycle   | 4.4                       | 95.7                          | 90.7                                       |
| After five cutting-healing cycles | 3.35                      | 51.4                          | 69.1                                       |
| After nine cutting-healing cycles | 2.69                      | 45.3                          | 55.5                                       |
